# Supplementary material for: A suite of coupled ocean-sea ice simulations examining the effect of changes in sea-ice thickness distribution on ice-ocean interaction in the Arctic Ocean
Source: Copernicus journal article supplement (doi:10.5194/egusphere-2025-3022), 2025-06-27
Supplement: Supplementary file [file egusphere-2025-3022-RC1-supplement.pdf]

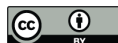

# **A suite of coupled ocean-sea ice simulations examining the effect of changes in sea-ice thickness distribution on ice-ocean interaction in the Arctic Ocean**

Hiroshi Sumata<sup>1,2</sup>, Mats A. Granskog<sup>2</sup>, Pedro Duarte<sup>2</sup>

<sup>1</sup>Norwegian Meteorological Institute, Tromsø, Norway

<sup>2</sup>Norwegian Polar Institute, Fram Centre, Tromsø, Norway

*Correspondence to:* Hiroshi Sumata (hiroshi.sumata@met.no)

## **Abstract**

A major shift in Arctic sea ice occurred in 2007, transitioning from thicker, deformed ice to thinner, more uniform ice with reduced surface roughness. This abrupt change likely altered the dynamic and thermodynamic interactions between sea ice and ocean, with potential implications for nutrient and biogeochemical cycles in both sea ice and the upper ocean. In this study, we present a suite of regional coupled ocean-sea ice simulations designed to assess the potential impact of the regime shift on sea ice-ocean interactions, with a regional focus on the Atlantic sector of the Arctic Ocean. The different sea ice regimes are represented by changes in ice thickness distribution described by ice thickness classes in the sea ice model, and the effects of the different regimes are simulated through variations in the drag coefficient diagnosed from the ice thickness distribution. We emulate different sea ice regimes by prescribing sea ice properties at the model's lateral boundaries. ~~We describe the experiment setups and the use of observational data that supports a comparison between pre and post regime shift sea ice conditions.~~ Key differences in the simulated physical environment are highlighted, with a focus on sea ice-ocean interactions and upper ocean stratification. The simulation framework and the physical analyses presented here serve as a basis for ocean biogeochemical modelling studies that aim at understanding ocean ecosystem responses to changing Arctic sea ice.

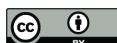

## 1. Introduction

Sea ice regulates momentum, heat, and material exchanges between atmosphere and ocean in polar regions. It also supports biological production in and **under ice** (e.g., Leu et al., 2015; Assmy et al. 2017). Large-scale sea ice properties, namely sea ice concentration and thickness, govern the details of these processes (Weeks, 2010). Lower ice concentration and thinner ice allow larger heat, gas and material exchanges, while higher ice concentration with thicker ice suppresses such processes (Fanning and Torres, 1991; Loose et al., 2009). Surface topography of sea ice, such as sails, keels, and melt ponds significantly modify momentum exchanges between atmosphere, ice and ocean (Cole et al., 2017; Brenner et al., 2021; Mchedlishvili et al., 2023), with significant consequences on the upper ocean processes including biogeochemical cycles (Long et al. 2012).

Ice thickness distribution (ITD) is a critical parameter **to describe** contributions from different types of sea ice on those processes (Tsamados et al., 2014; Martin et al., 2016; Sterlin et al., 2023). ITDs represent the amount of ice across different thickness classes within a given area. They can be derived from direct measurements ~~of surface topography of ice with short temporal and/or small spatial intervals. This is achieved by e.g. ice thickness measurements~~ using altimeters or electro-magnetic sounding instruments (Haas et al., 2010; Farrel et al., 2011), or by upward-looking sonars on bottom-anchored moorings (e.g. Melling et al., 1995; Hansen et al., 2014). Modern sea ice models incorporate ITD in each grid cell, allowing **for the calculation** of the effects of varying ice thickness on both dynamic and thermodynamic processes (Tsamados et al., 2014; Sterlin et al., 2023).

A major shift of ITD was observed in the Arctic Ocean in 2007 (Sumata et al., 2023). The shift was from thicker and deformed ice to thinner and more uniform ice regime. The fraction of very thick ice (e.g., exceeding 5 m) observed in Fram Strait was suddenly reduced by half, and has not recovered to date (Sumata, 2022; see also Fig. 1a). At the same time, the modal ice thickness, representing the thickness of the most frequently observed ice, dropped by approximately 1 m (Fig. 2c, the peak location of blue versus orange). The fraction of ice in the **mode** also increased (Fig. 2c, the peak height of blue versus orange), suggesting smoother ice. **This** is also suggested by Krumpfen et al. (2015) based on airborne observations, with fewer and smaller ridges and reduced atmosphere-ice drag. These observed changes indicate that the ice floes after the shift are composed of a narrower range of thicknesses (less thickness variation and larger areal extent of flat level ice) with smaller sails and shallower keels (see Fig. 1b, c).

Such sudden, drastic changes in ITD **could have significant** impacts on ice – ocean interactions and upper ocean processes. The thinner ice is mechanically weaker (Hibler, 1979; Feltham, 2008), allowing more frequent lead formation (Rheinländer et al., 2024) and larger heat exchange (Landrum and Holland, 2022), and is prone to melting in summer. This may enhance the seasonal cycle of heat exchange between atmosphere and ocean through ice, and freshwater exchange between ice and ocean by enhanced melt-freeze cycle. The less deformed level sea ice, with smaller sails and shallower keels, has less dynamical interaction with the atmosphere and upper ocean (Cole et al., 2017; Brenner et al., 2021). Due to its smaller surface roughness, the ice after the regime shift is assumed to undergo a smaller drag force both from atmosphere and ocean. This may affect sea ice motion, while reducing momentum input from atmosphere to the ocean through ice, with possible consequences on upper ocean mixing and stratification.

These changes are arguably prominent in the Atlantic sector of the Arctic, ~~where the Arctic-wide altered sea ice is advected from the central Arctic.~~ A large fraction of sea ice in the central Arctic Ocean is initially formed in the surrounding marginal seas, e.g., Laptev, East Siberian, and Chukchi seas, and advected toward the Atlantic sector of the Arctic with time scales of 2 – 4 years (Sumata et al., 2023). Even sea ice formed in the Canada Basin is intermittently advected toward the Atlantic sector by the Transpolar Drift Stream (Hansen et al., 2014, Sumata et al., 2023) at a longer

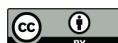

timescale. Thus, the Transpolar Drift integrates signals of changes occurring upstream in the Arctic and delivers them towards the Atlantic sector of the Arctic (Hansen et al., 2014; Krumpen et al., 2019).

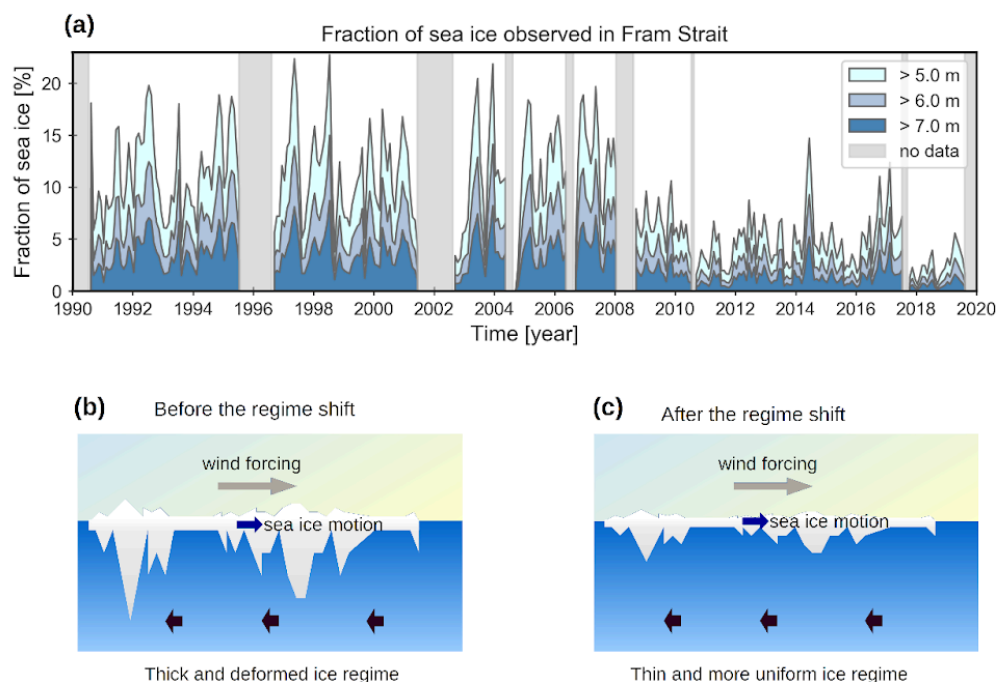

**Figure 1. (a) Fraction of thick sea ice observed in Fram Strait, and (b, c) schematic illustration of contrasting different sea ice regimes. (b) depicts the regime before the shift, characterized by thick ice with a larger fraction of heavily deformed ice. (c) shows the regime after the shift, characterized by thinner, less deformed ice with a larger fraction of level ice. The time series in (a) is derived from sea ice draft data collected by upward-looking sonars moored in the western side of Fram Strait from 1990 to 2019 (The Fram Strait Arctic Outflow Observatory, see data availability).**

Here we describe a suite of coupled ocean-sea ice simulations developed to investigate the possible consequences of the sea ice regime shift (particularly changes in the ice thickness distribution, ITD) on ice – ocean interaction and upper ocean processes. The simulations focus on the Atlantic sector of the central Arctic, specifically the downstream region of the Transpolar Drift Stream. To isolate the effects of the targeted processes, we employ a twin experiment approach, minimizing interference from other factors. The same experimental design is being applied to investigate the effects of the sea ice regime shift on upper ocean biogeochemistry, coupled to the same ocean and sea ice models used in this study. This work provides a detailed description of the physical component of the experiment and the resulting response of the physical environment. The paper is structured as follows; section 2 provides a description of the model and the experimental design, section 3 presents the results, and section 4 provides concluding remarks.

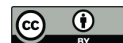

## 98 2. Experimental design

### 99 2.1 Coupled sea ice – ocean model

100 We apply a regional setup of a coupled sea ice – ocean model for the numerical simulations. The sea ice component is  
101 the Los Alamos Sea Ice Model (CICE Ver. 5.1.2, Hunke et al. 2015) and the ocean component is the Regional Ocean  
102 Modeling System (ROMS Ver. 3.7, Shchepetkin and McWilliams, 2005). They are coupled by the Model Coupling  
103 Toolkit (MCT, Larson et al., 2005) in the METROMS framework (Debernard et al., 2021). This modeling configuration  
104 has been applied to a variety of studies with different regional setups (e.g., Idžanović et al., 2023, Röhrs et al., 2023).  
105 The current study employs a regional setup covering the Atlantic sector of the Arctic Ocean (Fig. 2a) with 4 km  
106 horizontal resolution, 35 vertical ocean layers, and 7 ice plus 1 snow layers with 5 ice thickness classes. This specific  
107 regional setup has been developed and maintained at the Norwegian Polar Institute (Duarte et al., 2022).

108 The sea ice model describes ITD by discretized ice thickness classes and calculates contributions from different ice  
109 classes on dynamic and thermodynamic processes (Hunke et al., 2015). In each ice thickness class, the ice is further  
110 divided into two sub-categories, flat level ice and deformed ridged ice. The former ice has less contribution to the drag  
111 force at the interfaces while the latter has the larger and significant contribution as described below. Transfer of sea ice  
112 volume between ice classes and categories are governed by thermodynamic (e.g., melting, freezing) and dynamic (e.g.,  
113 ridging) processes in the model. The model describes momentum transfer between atmosphere, sea ice and ocean by a  
114 quadratic bulk formula with a variable drag coefficient. The drag coefficient varies in space and time and takes into  
115 account effects of time-evolving surface roughness of sea ice (form drag formulation, Tsamados et al., 2014). This  
116 formulation comprises an important part of the current experiment design, as the variable drag coefficient is diagnosed  
117 from the areal and volume fraction of ice in the ice thickness classes and categories, which represents the two different  
118 ice regimes in the simulation.

119

### 120 2.2 Variable drag coefficient

121 The form drag formulation computes the drag coefficient between sea ice and ocean as:

$$122 \quad C_d = C_{keel} + C_{floe} + C_{skin} \quad (1)$$

123 where  $C_{keel}$ ,  $C_{floe}$ , and  $C_{skin}$  represent contributions from ice keels, floe edges, and skin drag, respectively. The drag  
124 coefficient between ice and atmosphere also has the same formula, with an additional contribution from melt pond  
125 edges. Although the form drag formulation is applied at both the ice-ocean and ice-atmosphere interfaces, we focus here  
126 on the ice-ocean interface to avoid redundancy (the differences being the inclusion of melt pond edges and the use of  
127 distinct parameter values). Following Tsamados et al. (2014), the contributions from ice keels, floe edges and skin drag  
128 are formulated as a function of surface topography of sea ice (Fig. 2a). The essence of modeling the variable drag  
129 coefficient is to relate prognostic variables in the model (e.g., volume fraction of ridged ice in a grid cell) to the drag  
130 coefficient, with simplified assumptions on the mean shape of topographic features of ice (e.g., ridges and keels).

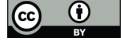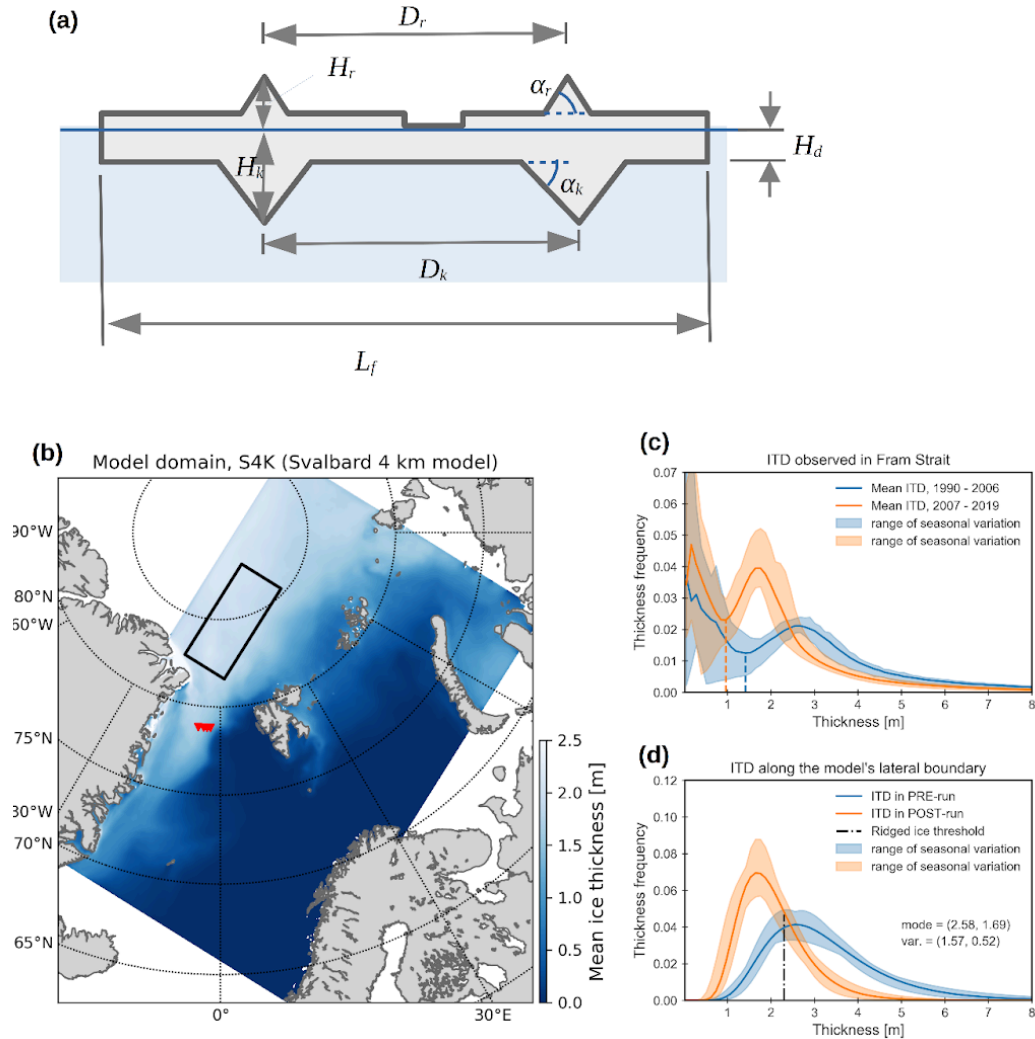

131

132 **Figure 2.** (a) Sketch of sea ice topography assumed in the form drag formulation (modified from Tsamados et al.,  
133 2014); (b) model domain; (c) mean sea ice thickness distribution observed in Fram Strait; and (d) those  
134 prescribed at the lateral boundaries of the model domain. The data acquisition areas in Fram Strait are  
135 indicated by red markers in panel (b). The solid black box in panel (b) denotes the focus area used in the  
136 Transpolar Drift analysis in sect. 3.

137

138 The contribution from keels is given by a function of ice concentration,  $A$ , the mean keel depth,  $H_k$ , and the mean  
139 distance between keels,  $D_k$ , as follows (see also Fig. 2a),

140 
$$C_{keel} = \frac{1}{2} c_k A \frac{H_k}{D_k} S_k^2 P_k, \quad (2)$$

141 where  $c_k$  is the local resistance of a keel,  $S_k$  represents sheltering effect by a keel (given by a function of ridging  
142 intensity,  $H_k/D_k$ ), and  $P_k$  represents integrated effect of boundary layer on the keel drag (see Table 1 for details and a



summary of notation). The contribution from floe edges is similarly formulated as a function of ice concentration,  $A$ , ice draft,  $H_d$ , and the mean floe length,  $L_f$ , as

$$C_{floe} = \frac{1}{2} c_f A \frac{H_d}{L_f} S_f^2 P_d. \quad (3)$$

where  $c_f$  is the local resistance at floe edges,  $S_f$  represents sheltering effect by floe edges (Lüpkes et al., 2012), and  $P_d$  represents integrated effect of boundary layer on the floe edge drag. The contribution from the skin drag with a presence of ice keels is given as follows,

$$C_{skin} = c_s \left( 1 - m_w \frac{H_k}{D_k} \right), \quad (4)$$

where  $c_s$  is the local skin drag coefficient and  $m_w$  is the attenuation parameter for skin drag. The above equations, (2), (3) and (4) relate drag coefficients to the topographic parameters of sea ice (e.g.,  $H_k$ ,  $D_k$ ,  $L_f$ ) in each grid cell. The topographic parameters are diagnosed from the prognostic variables in the sea ice model: sea ice concentration,  $A$ , areal fraction of ridged ice,  $a_{rdg}$ , and volume fraction of ridged ice,  $v_{rdg}$ ,

$$H_k = 2 \frac{v_{rdg}}{a_{rdg}} \psi_s, \quad (5)$$

$$D_k = 2 H_k \frac{A}{a_{rdg}} \psi_\theta, \quad (6)$$

$$L_f = L_{min} \left( \frac{A_*}{A_* - A} \right)^{\frac{1}{2}}, \quad (7)$$

where  $\psi_s$  and  $\psi_\theta$  are fixed parameters describing the mean shape of the keels (Table 1),  $L_{min}$  is a prescribed minimum floe length, and  $A_*$  is a number close to but slightly larger than 1 introduced to avoid singularity of  $L_f$  when  $A \sim 1$ . These quantities are diagnosed in each grid cell after summing up areal and volume fraction of ridged ice in all ice thickness classes. Therefore, temporal evolution of ITD including fraction of ridged ice changes the modeled drag coefficient by changing topographic parameters of sea ice,  $H_k$ ,  $D_k$ ,  $H_d$ , and  $L_f$ . In the following subsection, we describe how we prescribe the prognostic sea ice variables along the model's lateral boundary to set up the twin experiments.

**Table 1. List of variables used in the form drag formulation.**

| notation   | description                                                                                           | Formula or values used in the model*                                                  |
|------------|-------------------------------------------------------------------------------------------------------|---------------------------------------------------------------------------------------|
| $A$        | Sea ice concentration                                                                                 | Prognostic variable in the model                                                      |
| $A_*$      | A number close to but slightly larger than 1 introduced to avoid singularity of $L_f$ at $A \sim 1$ . | $A_* = \frac{1}{1 - \left( \frac{L_{min}}{L_{max}} \right)^2}$ (Tsamados et al. 2014) |
| $a_{rdg}$  | Areal fraction of ridged ice in unit area                                                             | Prognostic variable in the model                                                      |
| $C_d$      | Drag coefficient between ice and ocean                                                                | Eq. (1)                                                                               |
| $C_{floe}$ | Form drag from floe edges                                                                             | Eq. (3)                                                                               |
| $C_{keel}$ | Form drag from ice keels                                                                              | Eq. (2)                                                                               |
| $C_{skin}$ | Skin drag at ice – ocean interface                                                                    | Eq. (4)                                                                               |
| $c_f$      | Local resistance coefficient at floe edges                                                            | $c_f = 0.2$ (Tsamados et al., 2014)                                                   |
| $c_k$      | Local resistance coefficient of a keel                                                                | $c_k = 0.5$ (Schröder et al, 2019)                                                    |
| $c_s$      | Local skin drag coefficient                                                                           | $c_s = 5.0 \times 10^{-4}$ (Schröder et al, 2019)                                     |
| $D_k$      | Mean distance between keels                                                                           | Eq. (6)                                                                               |
| $H_d$      | Mean ice draft                                                                                        | Prognostic variable in the model                                                      |



|               |                                                                      |                                                                                                            |
|---------------|----------------------------------------------------------------------|------------------------------------------------------------------------------------------------------------|
| $H_k$         | Mean keel depth                                                      | Eq. (5)                                                                                                    |
| $L_f$         | Mean floe length                                                     | Eq. (7)                                                                                                    |
| $L_{min}$     | Minimum length of ice floe                                           | $L_{min} = 8$ [m] (Tsamados et al., 2014)                                                                  |
| $L_{max}$     | Maximum length of ice floe                                           | $L_{max} = 300$ [m] (Tsamados et al., 2014)                                                                |
| $m_w$         | Skin drag attenuation parameter                                      | $m_w = 10.0$ (Tsamados et al., 2014)                                                                       |
| $P_d$         | Boundary layer effect on a drag by floe edges                        | $P_d = \left[ \frac{\ln\left(\frac{H_d}{z_{0o}}\right)}{\ln\left(\frac{z_{ref}}{z_{0o}}\right)} \right]^2$ |
| $P_k$         | Boundary layer effect on a keel drag                                 | $P_k = \left[ \frac{\ln\left(\frac{D_k}{z_{0i}}\right)}{\ln\left(\frac{z_{ref}}{z_{0i}}\right)} \right]^2$ |
| $S_f$         | Sheltering function of floe edges, suggested by Lüpkes et al. (2012) | $S_f = \left[ 1 - \exp\left(-s_f \frac{(1-A)}{2}\right) \right]^{\frac{1}{2}}$                             |
| $S_k$         | Sheltering function of a keel                                        | $S_k = \left[ 1 - \exp\left(-s_l \frac{D_k}{H_k}\right) \right]^{\frac{1}{2}}$                             |
| $s_f$         | Attenuation parameter of shielding effect by floe edges              | $s_f = 22$ (Lüpkes et al., 2012)                                                                           |
| $s_l$         | Attenuation parameter of shielding effect by a keel                  | $s_l = 0.18$ (Tsamados et al., 2014)                                                                       |
| $v_{rdq}$     | Volume fraction of ridged ice in unit area                           | Prognostic variable in the model                                                                           |
| $z_{0i}$      | Ice surface roughness                                                | $z_{0i} = 1.0 \times 10^{-4}$ [m]                                                                          |
| $z_{0o}$      | Ocean surface roughness                                              | $z_{0o} = 3.27 \times 10^{-4}$ [m]                                                                         |
| $z_{ref}$     | Reference depth for stability                                        | $z_{ref} = 10$ [m]                                                                                         |
| $\psi_s$      | A fixed topographic parameter describing the mean shape of the keels | See Tsamados et al. (2014) Eq. (24) or Brenner et al. (2021) Eq. (13a)                                     |
| $\psi_\theta$ | A fixed topographic parameter describing the mean shape of the keels | See Tsamados et al. (2014) Eq. (25) or Brenner et al. (2021) Eq. (13b)                                     |

165

### 166 2.3 A suite of twin experiments

167 We set up a set of twin experiments with two distinctive sea ice regimes. One represents the thick and deformed ice  
168 regime before 2007 (hereafter called PRE-run), while the other represents thin and more uniform ice regime after 2007  
169 (hereafter POST-run). We define the two regimes through idealized ITDs (Fig. 2d), based on those observed in Fram  
170 Strait (Sumata, 2022; see Fig. 2c). The ITDs are prescribed along the model's lateral boundary (Sumata et al., 2025).  
171 Since the large fraction of sea ice in the model domain is advected from the central Arctic by Transpolar Drift, the  
172 domain is filled with sea ice coming from the model's northern and eastern boundary with a time lag shorter than one  
173 year. This setup enables us to prescribe sea ice conditions inside the model domain by those along the boundary, without  
174 manipulating sea ice inside the domain.

175 The idealized ITDs shown in Fig. 2d are derived from a least-squares fit of the observed ITDs for the two periods (Fig.  
176 2c) to lognormal distributions. The fraction of thin ice observed in Fram Strait was excluded by a cut off threshold at the  
177 minimum frequency of the bi-modal thickness distributions (dashed lines in Fig. 2c). This approach removes the  
178 fraction of new and young thin ice formed in the vicinity of Fram Strait and enables us to provide approximate ITDs for  
179 the central Arctic (see, e.g., Rabenstein et al., 2010, von Albedyll et al., 2021). The fit is applied for monthly ITDs for  
180 both PRE-run and POST-run. The fraction of ridged ice is defined by a fixed threshold of 2.3 m for simplicity  
181 (dot-dashed line in Fig. 2d). All the ice thinner than the threshold is categorized as level ice, while thicker ice is  
182 categorized as ridged ice in both cases. The ITDs shown in Fig. 2d with the distinction between level and ridged ice are  
183 remapped to the model's ice classes and given as the lateral boundary condition for each run.



We apply the same initial conditions, ocean boundary conditions and surface atmospheric forcing in both runs. Only the lateral boundary condition for ITD differs between the two runs. The initial conditions for the ocean are given by the Pan-Arctic 4 km model (A4 model, Hatterman et al., 2016), while the simulations start from no-ice condition. The latter is to assure filling the model domain by sea ice, the ITDs of which are prescribed at the lateral boundaries. The lateral boundaries of the model ocean are forced by the A4 model, while those of sea ice (other than the prescribed ITD) are forced by the reanalysis field from TOPAZ4 data assimilation system (Sakov et al., 2012, Xie et al., 2017). The model is driven by ERA5 atmospheric reanalysis field (Hersbach et al., 2020), from 2012 to 2015. The short simulation window (4 years) is employed to preserve the similarity of the background ocean stratification of the twin experiments. The last 3 years (2013 – 2015) are used for the analyses.

An additional set of sensitivity experiments are also conducted to examine the interplay between dynamical ice-ocean coupling and changes in buoyancy flux in the upper ocean. In these sensitivity experiments, we use the same ice thickness distribution (ITD) representing the condition after the regime shift (POST), but with different fractions of ridged ice. These experiments are referred to as the POST.rdg and POST.lvl runs (see Table 2). The POST.rdg run represents a ridged ice regime, using the ITD from POST with a threshold of 1.9 m to define ridged ice. This results in a higher fraction of ridged ice compared to the POST run, while maintaining the same mean ice thickness. In contrast, the POST.lvl run represents a level ice regime, applying the same ITD (POST) but using a threshold of 3.1 m. This setup increases the fraction of level ice relative to the POST run though the mean ice thickness is unchanged.

All other model configurations, i.e., the initial ocean and ice conditions, lateral ocean boundary conditions, and surface atmospheric forcing, are identical to those in the PRE and POST runs. This setup ensures that the surface buoyancy forcing remains the same (as sea ice concentration and mean ice thickness are unchanged) while modifying the dynamical coupling through different ice - ocean drag coefficients, and enables us to isolate the effect of changes in dynamical coupling.

206

**Table 2. List of the twin and sensitivity experiments**

| Experiment name | Description                                                                                     |
|-----------------|-------------------------------------------------------------------------------------------------|
| PRE             | ITD and fraction of ridged ice representing period 1990 – 2006 (pre regime shift)               |
| POST            | ITD and fraction of ridged ice representing period 2007 – 2019 (post regime shift)              |
| POST.lvl        | ITD representing period 2007 – 2019 (post regime shift), more level sea ice and less ridged ice |
| POST.rdg        | ITD representing period 2007 – 2019 (post regime shift), less level sea ice and more ridged ice |

208

209

### 3. Physical environment simulated in the twin experiments

#### 3.1 Changes in sea ice and momentum transfer

The twin experiments successfully reproduced two distinct sea ice regimes in the Atlantic sector of the Arctic. The mean ice thickness in the perennial ice-covered area reduced by approximately 1 m in the POST-run (Fig. 3a, b), while changes in ice concentration were limited in marginal ice zones (Fig. 3c, similar results in summer are omitted for brevity). The volume of ridged ice ( $V_{rdg}$ ) and ridging intensity ( $H_r/D_k$ ) also decreased in POST-run (Fig. 3d, e), consistent with the prescribed boundary conditions. The reduced ridging intensity lowered the effect of keel drag,



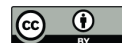

which, consequently, led to a smaller total drag coefficient (Fig. 3f). The effects of other drag terms were generally small: contributions from floe edge were limited in summer to less than 30% at maximum, and the skin drag was more than one order of magnitude smaller than other terms.

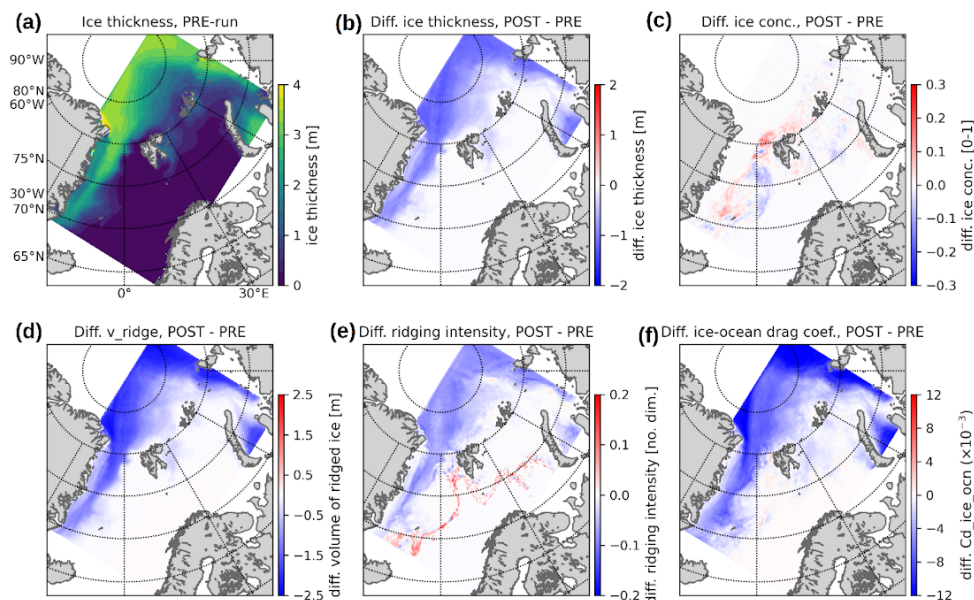

220

**Figure 3. Spatial pattern of simulated sea ice properties and their difference between POST and PRE runs (POST - PRE): (a) Mean ice thickness in PRE run. Differences of mean (b) ice thickness, (c) ice concentration, (d) volume of ridged ice, (e) ridging intensity, and (f) total ice-ocean drag coefficient. All the panels show winter months average (from January to March). Panel (d) shows volume per unit area in [m].**

225

The reduction of both atmosphere-ice and ice-ocean drag coefficient decreased momentum exchange between atmosphere, ice and ocean (Fig. 4a, d), leading to different effects on ice drift speed during winter and summer. In winter, the reduced drag caused faster ice motion (Fig. 4b), whereas in summer, it resulted in slower ice motion (Fig. 4c). During winter, sea ice in the Atlantic sector is primarily driven by strong northerly winds, with ocean drag acting as a retarding force that slows ice drift (Fig. 4d, Nov. - Apr.). In the POST-run, the reduction of ice - ocean drag weakened this retarding force on the ice drift with the Transpolar Drift, allowing the ice to move faster. In summer, however, significant wind forcing is absent (Fig. 4d, Jun. - Oct.), and the southward ice motion in this region is primarily driven by ocean surface currents. The weaker drag in the POS-run reduced the driving force for this southward ice motion, resulting in slower ice drift.

The smaller momentum exchange in the POST-run reduced the dynamical coupling between sea ice and ocean and affected surface ocean currents. In winter (Fig. 4e, blue lines), ice moves faster than ocean surface currents and ocean currents exhibit a logarithmic decline downward in both runs. The smaller drag in POST-run resulted in faster ice motion and slower ocean current compared to PRE-run (Fig. 4e, blue dashed line versus blue solid line). In summer, ocean surface currents are faster than ice drift in both runs (Fig. 4e, orange lines). It has a maximum in the surface layer

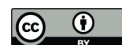

( $< 10$  m depth) and slows down upward, indicating that the ocean current drives ice. The weaker drag in POST-run makes the difference between ice motion and surface ocean current large, enabling the ocean to develop shallower velocity maximum. Additionally, the POST-run showed a more sharp logarithmic decline of the ocean currents with depth both in summer and winter (Fig. 4e, dashed lines versus solid lines), indicating weaker downward momentum transfer and a spin-down of the ocean circulation under ice.

245

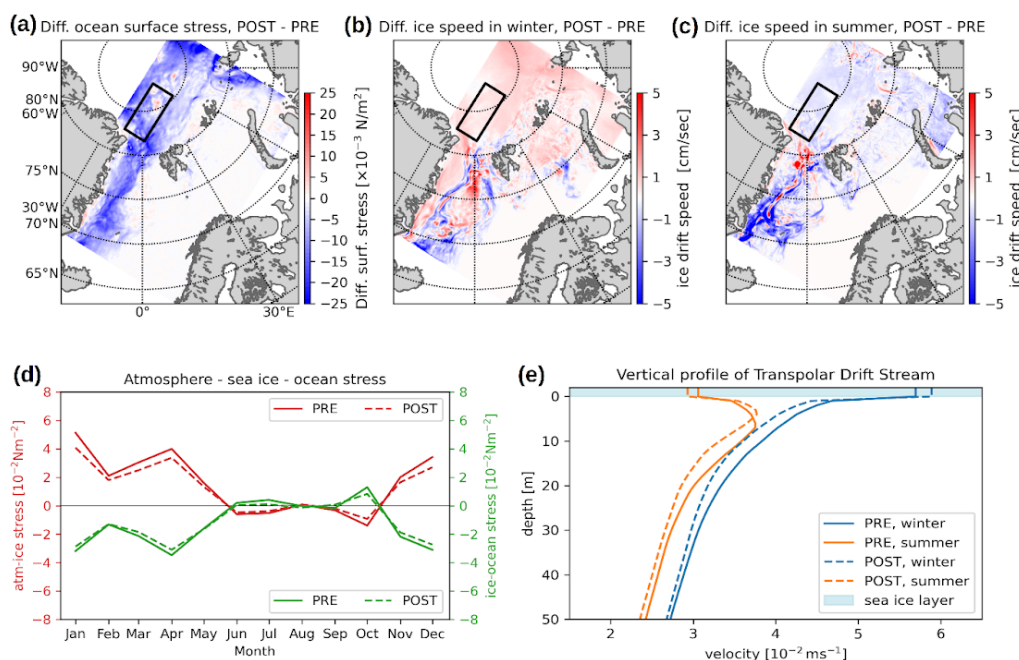

246

Figure 4. Differences between PRE and POST runs of (a) ocean surface stress, (b) ice velocity in winter, (c) ice velocity in summer, (d) atmosphere – ice – ocean stress, and (e) vertical velocity profile of the transpolar drift. Panel (a) shows the difference in annual mean surface stress. In panels (b), (c) and (e), winter refers to the period from January to March, summer refers to June to August. The solid-black rectangular box in panels (a) – (c) represents the region of the transpolar drift analyzed in panels (d) and (e). Panel (d) represents the stress component along the major axis of this box; positive values indicate a stress toward the Eastern coast of Greenland. The values are averaged over the boxed area. Panel (e) shows the vertical profile of the transpolar drift averaged over the boxed region. Positive values are defined as the same with panel (d). The light-blue shading represents sea ice velocity.

256

### 257 3.2 Changes in upper ocean

The weaker dynamical coupling in the POST-run made the upper ocean less energetic. The less momentum transfer between ice and ocean in POS-run resulted in reduction of both mean and eddy kinetic energy (hereafter MKE and



EKE) in the upper ocean, roughly in the depth range of the mixed layer (Fig. 5a, b). Here we divided the mean and eddy fluctuations by a 30 days temporal filtering, i.e.,

$$MKE = \frac{\bar{u}^2 + \bar{v}^2}{2}, \quad (8)$$

where  $\bar{u}$  and  $\bar{v}$  are the 30 days low-pass filtered  $u$  and  $v$ , while

$$EKE = \frac{(u'^2 + v'^2)}{2}, \quad (9)$$

where  $u'$  and  $v'$  are the 30 days high-pass filtered velocity. MKE in the shallow part of the ocean ( $< 20$  m) exhibits a strong seasonal cycle (shown by black thin contour in Fig. 5a); MKE is large in winter and small in summer. In POST-run, the reduction of MKE was evident in winter, while a slight increase occurred in summer (color shade in Fig. 5a), indicating that the seasonal cycle of MKE became weaker in POST-run as a consequence of the weaker dynamical coupling. In contrast to MKE, EKE is large in summer (black thin contours in Fig. 5b). In summer, ice is thin, weakly connected laterally, and vulnerable to deformation. The fragile ice condition in summer gives rise to spatially incoherent, nonuniform momentum exchange between ice and ocean. This developed mesoscale and short-timescale fluctuations of ocean current just underneath the ice cover (see e.g., supplementary material Fig. S1). Such fluctuations, represented by EKE, also reduced in POST-run (color shade in Fig. 5b) as a consequence of the weaker dynamical coupling.

275

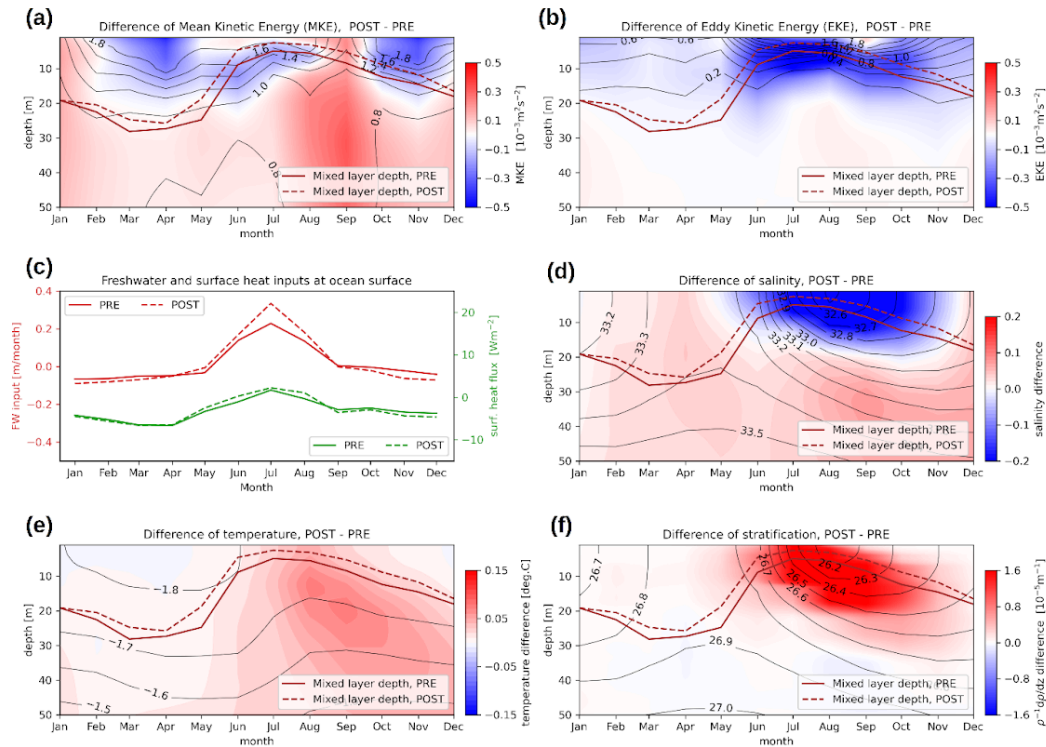

276



Figure 5. Differences in ocean properties between PRE and POST runs within the transpolar drift region: (a) Mean Kinetic Energy, (b) Eddy Kinetic Energy, (c) freshwater flux and surface heat flux, (d) salinity, (e) temperature, and (f) stratification. All values are averaged over the boxed area shown in Fig. 3a–c. In panels (a), (b), (d), and (e), black contours represent values from the PRE run, while colors indicate differences between the two runs. In panel (f), contours depict density from the PRE run, and colors represent changes in stratification between the two runs.

283

The weaker MKE and EKE in POST-run, together with changes in surface buoyancy fluxes, made the upper ocean more stratified and the mixed layer shallower. Due to the thinner modal ice thickness and weaker ice strength (suppl. Fig. S2), sea ice in POST-run is more prone to melting and mechanical fracture in summer. This enhances the seasonal cycle of heat and freshwater exchanges between ice and ocean (Fig. 5c). Though the changes in surface heat flux are small (green lines in Fig. 5c), the freshwater flux exhibited distinct changes; enhanced meltwater input to the upper ocean in summer and enhanced freshwater extraction due to freezing in winter (red lines in Fig. 5c). The increase of the freshwater input in summer made the surface ocean less saline (blue shade in Fig. 5d), while the increase of freshwater extraction in winter made the surface ocean slightly more saline (red shade in Fig. 5d). As a consequence, POST-run exhibited an enhanced seasonal cycle of ocean surface salinity. Together with the suppressed mixing (suppl. Fig. S3) associated with the smaller MKE and EKE (Fig. 5a, b), the changes in freshwater exchange made the surface ocean more stratified and shoals the mixed layer in POST-run (magenta lines in Fig. 5d, e and f).

A set of sensitivity experiments underscores the significant role of the interplay between dynamical coupling and buoyancy flux in capturing the integrated effect. In the sensitivity experiments (POST.lvl versus POST.rdg, see Table 2), the same buoyancy flux was applied at the ocean surface while only the dynamical coupling was altered. The results again demonstrated a reduction in EKE (Fig. 6a) and weaker surface mixing under weaker dynamical coupling. However, due to negligible changes in freshwater flux (Fig. 6b), surface freshening was absent (Fig. 6c versus Fig. 5d) and changes in mixed layer depth were not visible (Fig. 6a magenta lines). The weaker mixing led to increased stratification near the ocean surface, particularly during summer (Fig. 6d), reflecting the absence of additional freshwater forcing at the surface (Fig. 6b versus Fig. 5c). These findings emphasize the necessity of simultaneously considering dynamic and thermodynamic changes in sea ice to fully understand their impact on the upper ocean.

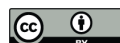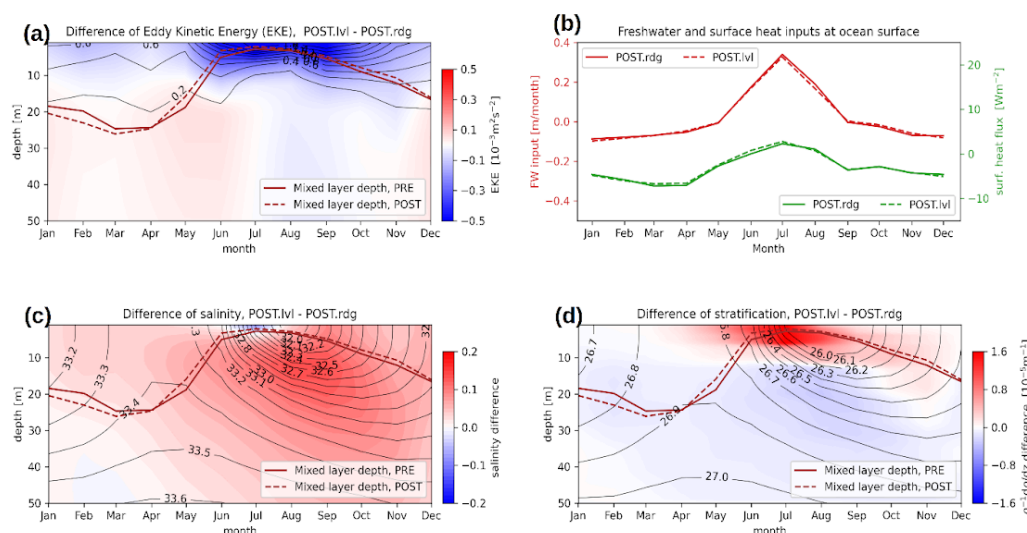

304

305 **Figure 6.** Differences in ocean properties between POST.rdg and POST.lvl runs within the transpolar drift  
306 region: (a) Eddy Kinetic Energy, (b) freshwater flux and surface heat flux, (c) salinity, (d) stratification. All  
307 values are averaged over the boxed area shown in Fig. 2b. In panels (a), (c), and (d), black contours represent  
308 values from the POST.rdg run, while colors indicate differences between the two runs. In panel (d), contours  
309 depict density from the POST.rdg run, and colors represent changes in stratification between the two runs.

310

#### 311 4. Concluding remarks

312 We set up a suite of coupled sea ice-ocean simulations to examine the possible impact of the sea ice regime shift  
313 (Sumata et al., 2023), namely the effect of thinner and less deformed sea ice on the ice-ocean interactions in the Atlantic  
314 sector of the Arctic. After 2007 the ice is characterized by two notable changes from earlier, namely lower mean ice  
315 thickness with a higher fraction of ice in the modal category, and the reduction in surface roughness. These sea ice  
316 features were prescribed by ice thickness distribution along the lateral boundaries of the model domain, and we emulate  
317 the two distinctive sea ice regimes before and after the shift. Based on these experiments, we describe the apparent  
318 responses, with a focus on sea ice-ocean interaction and upper ocean processes in the perennial ice-covered area.

319 Our experiments suggest that the thinner and smoother ice enhances freshwater exchange between ice and ocean, as it is  
320 mechanically weaker and more sensitive to thermal forcing. This leads to increased ice melt during summer and more  
321 ice formation in winter, amplifying the seasonal variability in surface salinity. This strengthens upper ocean  
322 stratification during summer and reduces the mixed layer depth. The decrease in surface roughness, on the other hand,  
323 lowers the drag both at the ice-ocean and ice-atmosphere interfaces, weakening the dynamical coupling between them.  
324 In winter, this enables faster sea ice drift under the same wind forcing, whereas in summer, it decelerates ice motion  
325 driven by ocean currents. The weakened dynamical coupling also decouples ocean surface currents from ice motion,  
326 resulting in reduced kinetic energy in both mean and eddy currents especially in the mixed layer. Consequently, vertical  
327 mixing is suppressed, momentum transfer to deeper layers is reduced, and the upper ocean becomes more stratified with  
328 thinner and less deformed ice. This suggests that in the current thinner and smoother ice regime we have likely less



329 mixing and nutrient replenishment of the shallower and more stratified surface layer due to reduced ice-ocean  
330 momentum transfer. Though the ultimate shift in primary productivity depends on a complex interplay of mixing,  
331 stratification, and light availability, the suite of experiments provided here can also serve as a foundation for a better  
332 understanding of physical-biogeochemical coupling in a changing climate.

333 Note that this study specifically addresses one aspect of the ongoing changes in sea ice–ocean processes in the Atlantic  
334 sector of the Arctic, without attempting to encompass the full spectrum of influencing factors. It does not incorporate  
335 changes in wind forcing (Ward and Tandon, 2023; Muilwijk et al., 2024), retreat of sea ice cover (Serreze et al., 2007;  
336 Fox-Kemper et al., 2021), increased ocean heat content in adjacent marginal seas (Timmermans, 2015; Lind et al., 2018;  
337 Muramatsu et al., 2025), and modifications in large-scale ocean circulation and stratification (Polyakov et al., 2017,  
338 2020). Given the simultaneous occurrence and interaction of these factors, isolating a single process allows for a more  
339 detailed examination of the dynamics within this complex system. Further investigations are necessary to examine  
340 effects of other key factors and their interplay, in parallel to improvement of key processes of ice-ocean interactions,  
341 such as parameterizations of ice topography and ice - ocean coupling.

342

#### 343 **Code availability.**

344 The software code used in this study for the Barents-2.5 km model may be found at  
345 <https://doi.org/10.5281/zenodo.5067164> (Debernard et al., 2021) and <https://doi.org/10.5281/zenodo.5800110> (Duarte,  
346 2021). The ocean modeling code is a ROMS branch. Code licensing may be found at  
347 [http://www.myroms.org/index.php?page=License\\_](http://www.myroms.org/index.php?page=License_)  
348 ROMS (last access: 17 May 2022). The software code used in this study for the SA4 model may be found at  
349 <https://doi.org/10.5281/zenodo.5815093> (Duarte, 2022).

350

#### 351 **Data availability.**

352 Model forcing, initial and boundary conditions for all experiments described herein are publicly available at  
353 [10.21334/npolar.2025.70c53c63](https://doi.org/10.21334/npolar.2025.70c53c63) (Sumata et al., 2025). The sea ice draft frequency data collected from the Fram Strait  
354 Arctic Outflow Observatory is available at <https://doi.org/10.21334/npolar.2022.B94CB848> (Sumata, 2022).

355

#### 356 **Author contributions.**

357 Conceptualization: HS, Methodology: HS, Numerical simulations: HS and PD, Data processing and analyses: HS,  
358 Visualization: HS, Investigation: HS, PD and MAG, Writing-original draft: HS, Writing-review and editing: HS, PD  
359 and MAG, Funding acquisition: MAG, Project lead: MAG.

360

#### 361 **Competing interests.**

362 The corresponding author has declared that one of the authors has any competing interests.

363

#### 364 **Acknowledgments.**

365 This study was supported by the European Union’s Horizon 2020 research and innovation programme under grant no.  
366 101003826 via project CRiceS, and the Norwegian Metacenter for Computational Science application NN9300K and  
367 NS9081K.





368

369

## 370 References

371 Assmy, P., Fernandez-Mendez, M., Duarte, P., Meyer, A., Randelhoff, A., Mundy, C. J., Olsen, L. M., Kauko, H. M.,  
372 Bailey, A., Chierici, M., Cohen, L., Dougeris, A. P., Ehn, J. K., Fransson, A., Gerland, S., Hop, H., Hudson, S. R.,  
373 Hughes, N., Itkin, P., Johnsen, G., King, J. A., Koch, B. P., Koenig, Z., Kwasniewski, S., Laney, S. R., Nicolaus, M.,  
374 Pavlov, A. K., Polashenski, C. M., Provost, C., Rosel, A., Sandbu, M., Spreen, G., Smedsrud, L. H., Sundfjord, A.,  
375 Taskjelle, T., Tatarek, A., Wiktor, J., Wagner, P. M., Wold, A., Steen, H., and Granskog, M. A.: Leads in Arctic pack ice  
376 enable early phytoplankton blooms below snow-covered sea ice, *Sci Rep-Uk*, 7, Artn 40850, 10.1038/Srep40850, 2017.

377 Brenner, S., Rainville, L., Thomson, J., Cole, S., and Lee, C.: Comparing Observations and Parameterizations of  
378 Ice-Ocean Drag Through an Annual Cycle Across the Beaufort Sea, *J Geophys Res-Oceans*, 126, ARTN  
379 e2020JC016977, 10.1029/2020JC016977, 2021.

380 Cole, S. T., Toole, J. M., Lele, R., Timmermans, M. L., Gallaher, S. G., Stanton, T. P., Shaw, W. J., Hwang, B., Maksym,  
381 T., Wilkinson, J. P., Ortiz, M., Graber, H., Rainville, L., Petty, A. A., Farrell, S. L., Richter-Menge, J. A., and Haas, C.:  
382 Ice and ocean velocity in the Arctic marginal ice zone: Ice roughness and momentum transfer, *Elementa-Sci Anthropol*, 5,  
383 Artn 55, 10.1525/Elementa.241, 2017.

384 Debernard, J., Kristensen, N. M., Maartensson, S., Wang, K., Hedstrom, K., Brændshøj, J., and Szapiro, N.:  
385 met-no/metroms: Version 0.4.1 (v0.4.1), Zenodo [code], <https://doi.org/10.5281/zenodo.5067164>, 2021.

386 Duarte, P., Brændshøj, J., Shcherbin, D., Barras, P., Albreten, J., Gusdal, Y., Szapiro, N., Martinsen, A., Samuelsen, A.,  
387 Wang, K., and Debernard, J. B.: Implementation and evaluation of open boundary conditions for sea ice in a regional  
388 coupled ocean (ROMS) and sea ice (CICE) modeling system, *Geosci. Model Dev.*, 15, 4373–4392,  
389 <https://doi.org/10.5194/gmd-15-4373-2022>, 2022.

390 Fanning, K. A. and Torres, L. M.: Rn-222 and Ra-226 - Indicators of Sea-Ice Effects on Air-Sea Gas-Exchange, *Polar*  
391 *Res*, 10, 51-58, DOI 10.1111/j.1751-8369.1991.tb00634.x, 1991.

392 Farrell, S. L., Kurtz, N., Connor, L. N., Elder, B. C., Leuschen, C. and Markus, T.: A first assessment of IceBridge snow  
393 and ice thickness data over Arctic sea ice, *IEEE Transactions on Geoscience and Remote Sensing*, 50, 2098 - 2111,  
394 <https://doi.org/10.1109/TGRS.2011.2170843>, 2011.

395 Feltham, D. L.: Sea ice rheology, *Annu Rev Fluid Mech*, 40, 91-112, 10.1146/annurev.fluid.40.111406.102151, 2008.

396 Fox-Kemper, B., et al.: Ocean, Cryosphere and Sea Level Change. In *Climate Change 2021: The Physical Science*  
397 *Basis. Contribution of Working Group I to the Sixth Assessment Report of the Intergovernmental Panel on Climate*  
398 *Change* [Masson-Delmotte, V., P. et al. (eds.)]. Cambridge University Press, Cambridge, United Kingdom and New  
399 York, NY, USA, pp. 1211–1362, doi:10.1017/9781009157896.011, 2021.

400 Haas, C., Hendricks, S., Eicken, H., and Herber, A.: Synoptic airborne thickness surveys reveal state of Arctic sea ice  
401 cover, *Geophys Res Lett*, 37, Artn L09501, 10.1029/2010gl042652, 2010.



- 402 Hansen, E., Ekeberg, O. C., Gerland, S., Pavlova, O., Spreen, G., and Tschudi, M.: Variability in categories of Arctic sea  
403 ice in Fram Strait, *J Geophys Res-Oceans*, 119, 7175-7189, 10.1002/2014JC010048, 2014.
- 404 Hattermann, T., Isachsen, P. E., von Appen, W. J., Albretsen, J., and Sundfjord, A.: Eddy-driven recirculation of  
405 Atlantic Water in Fram Strait, *Geophys Res Lett*, 43, 3406-3414, 10.1002/2016GL068323, 2016.
- 406 Hersbach, H., Bell, B., Berrisford, P., Hirahara, S., Horányi, A., Muñoz-Sabater, J., Nicolas, J., Peubey, C., Radu, R.,  
407 Schepers, D., Simmons, A., Soci, C., Abdalla, S., Abellan, X., Balsamo, G., Bechtold, P., Biavati, G., Bidlot, J.,  
408 Bonavita, M., De Chiara, G., Dahlgren, P., Dee, D., Diamantakis, M., Dragani, R., Flemming, J., Forbes, R., Fuentes,  
409 M., Geer, A., Haimberger, L., Healy, S., Hogan, R. J., Hólm, E., Janisková, M., Keeley, S., Laloyaux, P., Lopez, P.,  
410 Lupu, C., Radnoti, G., de Rosnay, P., Rozum, I., Vamborg, F., Villaume, S., and Thépaut, J. N.: The ERA5 global  
411 reanalysis, *Q J Roy Meteor Soc*, 146, 1999-2049, 10.1002/qj.3803, 2020.
- 412 Hibler III, W. D.: A dynamic thermodynamic sea ice model, *J. Phys. Oceanogr.*, 9, 815 - 846,  
413 [https://doi.org/10.1175/1520-0485\(1979\)009<0815:ADTSIM>2.0.CO;2](https://doi.org/10.1175/1520-0485(1979)009<0815:ADTSIM>2.0.CO;2), 1979.
- 414 Hunke, C. E., Lipscomb, W. H., Turner, A. K., Jeffery, N., Elliott, S.: CICE: the Los Alamos Sea Ice Model  
415 Documentation and Software User's Manual Version 5.1 LA-CC-06-012, available at  
416 <https://github.com/CICE-Consortium/CICE-svn-trunk/blob/svn/tags/release-5.1/doc/cicedoc.pdf>, 2015.
- 417 Idzanovic, M., Rikardsen, E. S. U., and Röhrs, J.: Forecast uncertainty and ensemble spread in surface currents from a  
418 regional ocean model, *Front Mar Sci*, 10, Artn 1177337, 10.3389/Fmars.2023.1177337, 2023.
- 419 Krumpen, T., Belter, H. J., Boetius, A., Damm, E., Haas, C., Hendricks, S., Nicolaus, M., Nöthig, E. M., Paul, S.,  
420 Peeken, I., Ricker, R., and Stein, R.: Arctic warming interrupts the Transpolar Drift and affects long-range transport of  
421 sea ice and ice-rafted matter, *Sci Rep-Uk*, 9, Artn 5459, 10.1038/S41598-019-41456-Y, 2019.
- 422 Krumpen, T., von Albedyll, L., Bünger, H. J., Castellani, G., Hartmann, J., Helm, V., Hendricks, S., Hutter, N., Landy, J.  
423 C., Lisovski, S., Lüpkes, C., Rohde, J., Suhrhoff, M., and Haas, C.: Smoother sea ice with fewer pressure ridges in a  
424 more dynamic Arctic, *Nat Clim Change*, 15, 10.1038/s41558-024-02199-5, 2025.
- 425 Landrum, L. L. and Holland, M. M.: Influences of changing sea ice and snow thicknesses on simulated Arctic winter  
426 heat fluxes, *Cryosphere*, 16, 1483-1495, 10.5194/tc-16-1483-2022, 2022.
- 427 Larson, J., Jacob, R., and Ong, E.: The Model Coupling Toolkit: A new fortran90 toolkit for building multiphysics  
428 parallel coupled models, *Int J High Perform C*, 19, 277-292, 10.1177/1094342005056115, 2005.
- 429 Leu, E., Mundy, C. J., Assmy, P., Campbell, K., Gabrielsen, T. M., Gosselin, M., Juul-Pedersen, T., and Gradinger, R.:  
430 Arctic spring awakening - Steering principles behind the phenology of vernal ice algal blooms, *Prog Oceanogr*, 139,  
431 151-170, 10.1016/j.pocean.2015.07.012, 2015.
- 432 Lind, S., Ingvaldsen, R. B., and Furevik, T.: Arctic warming hotspot in the northern Barents Sea linked to declining  
433 sea-ice import, *Nat Clim Change*, 8, 634-+, 10.1038/s41558-018-0205-y, 2018.
- 434 Long, M. H., Koopmans, D., Berg, P., Rysgaard, S., Glud, R. N., and Sogaard, D. H.: Oxygen exchange and ice melt  
435 measured at the ice-water interface by eddy correlation, *Biogeosciences*, 9, 1957-1967, 10.5194/bg-9-1957-2012, 2012.





- 436 Loose, B., McGillis, W. R., Schlosser, P., Perovich, D., and Takahashi, T.: Effects of freezing, growth, and ice cover on  
437 gas transport processes in laboratory seawater experiments, *Geophys Res Lett*, 36, Artn L05603,  
438 10.1029/2008gl036318, 2009.
- 439 Lüpkes, C., V. M. Gryanik, J. Hartmann, and E. L. Andreas (2012), A parametrization, based on sea ice morphology, of  
440 the neutral atmospheric drag coefficients for weather prediction and climate models, *J. Geophys. Res.*, 117, D13112,  
441 doi:10.1029/2012JD017630.
- 442 Martin, T., Tsamados, M., Schroeder, D., and Feltham, D. L.: The impact of variable sea ice roughness on changes in  
443 Arctic Ocean surface stress: A model study, *J Geophys Res-Oceans*, 121, 1931-1952, 10.1002/2015JC011186, 2016.
- 444 Mchedlishvili, A., Lüpkes, C., Petty, A., Tsamados, M., and Spreen, G.: New estimates of pan-Arctic sea  
445 ice-atmosphere neutral drag coefficients from ICESat-2 elevation data, *Cryosphere*, 17, 4103-4131,  
446 10.5194/tc-17-4103-2023, 2023.
- 447 Melling, H., Johnston, P. H., and Riedel, D. A.: Measurements of the Underside Topography of Sea-Ice by Moored  
448 Subsea Sonar, *J Atmos Ocean Tech*, 12, 589-602, Doi 10.1175/1520-0426(1995)012<0589:Motuto>2.0.Co;2, 1995.
- 449 Muilwijk, M., Hattermann, T., Martin, T., and Granskog, M. A.: Future sea ice weakening amplifies wind-driven trends  
450 in surface stress and Arctic Ocean spin-up, *Nat Commun*, 15, Artn 6889, 10.1038/S41467-024-50874-0, 2024.
- 451 Muramatsu, M., Watanabe, E., Itoh, M., Onodera, J., Mizobata, K., and Ueno, H.: Subsurface warming associated with  
452 Pacific Summer Water transport toward the Chukchi Borderland in the Arctic Ocean, *Sci Rep-Uk*, 15, Artn 24,  
453 10.1038/S41598-024-81994-8, 2025.
- 454 Polyakov, I. V., Pnyushkov, A. V., Alkire, M. B., Ashik, I. M., Baumann, T. M., Carmack, E. C., Goszczko, I., Guthrie,  
455 J., Ivanov, V. V., Kanzow, T., Krishfield, R., Kwok, R., Sundfjord, A., Morison, J., Rember, R., and Yulin, A.: Greater  
456 role for Atlantic inflows on sea-ice loss in the Eurasian Basin of the Arctic Ocean, *Science*, 356, 285-+,  
457 10.1126/science.aai8204, 2017.
- 458 Polyakova, I. V., Rippeth, T. P., Fer, I., Alkire, M. B., Baumann, T. M., Carmack, E. C., Ingvaldsen, R., Ivanov, V. V.,  
459 Janout, M., Lind, S., Padman, L., Pnyushkov, A. V., and Rember, R.: Weakening of Cold Halocline Layer Exposes Sea  
460 Ice to Oceanic Heat in the Eastern Arctic Ocean, *J Climate*, 33, 8107-8123, 10.1175/Jcli-D-19-0976.1, 2020.
- 461 Rabenstein, L., Hendricks, S., Martin, T., Pfaffhuber, A., and Haas, C.: Thickness and surface-properties of different  
462 sea-ice regimes within the Arctic Trans Polar Drift: Data from summers 2001, 2004 and 2007, *J Geophys Res-Oceans*,  
463 115, Artn C12059, 10.1029/2009jc005846, 2010.
- 464 Rheinlaender, J. W., Regan, H., Rampal, P., Boutin, G., Olason, E., and Davy, R.: Breaking the Ice: Exploring the  
465 Changing Dynamics of Winter Breakup Events in the Beaufort Sea, *J Geophys Res-Oceans*, 129, ARTN  
466 e2023JC020395, 10.1029/2023JC020395, 2024.
- 467 Röhrs, J., Gusdal, Y., Rikardsen, E. S. U., Moro, M. D., Braendshoi, J., Kristensen, N. M., Fritzner, S., Wang, K. G.,  
468 Sperrevik, A. K., Idzanovic, M., Laverigne, T., Debernard, J. B., and Christensen, K. H.: Barents-2.5km v2.0: an



- operational data-assimilative coupled ocean and sea ice ensemble prediction model for the Barents Sea and Svalbard, Geoscientific Model Development, 16, 5401-5426, 10.5194/gmd-16-5401-2023, 2023.
- Sakov, P., Counillon, F., Bertino, L., Lisaeter, K. A., Oke, P. R., and Korabev, A.: TOPAZ4: an ocean-sea ice data assimilation system for the North Atlantic and Arctic, Ocean Science, 8, 633-656, 2012.
- Schröder, D., Feltham, D. L., Tsamados, M., Ridout, A., and Tilling, R.: New insight from CryoSat-2 sea ice thickness for sea ice modelling, The Cryosphere, 13, 125–139, <https://doi.org/10.5194/tc-13-125-2019>, 2019.
- Serreze, M. C., Holland, M. M., and Stroeve, J.: Perspectives on the Arctic's shrinking sea-ice cover, Science, 315, 1533-1536, 10.1126/science.1139426, 2007.
- Shchepetkin, A. F. and McWilliams, J. C.: The regional oceanic modeling system (ROMS): a split-explicit, free-surface, topography-following-coordinate oceanic model, Ocean Model, 9, 347-404, 10.1016/j.ocemod.2004.08.002, 2005.
- Sterlin, J., Tsamados, M., Fichefet, T., Massonnet, F., and Barbic, G.: Effects of sea ice form drag on the polar oceans in the NEMO-LIM3 global ocean-sea ice model, Ocean Model, 184, Art102227, 10.1016/J.Ocemod.2023.102227, 2023.
- Sumata, H., de Steur, L., Divine, D. V., Granskog, M. A., and Gerland, S.: Regime shift in Arctic Ocean sea ice thickness, Nature, 615, 443–, 10.1038/s41586-022-05686-x, 2023.
- Sumata, H.: Monthly sea ice thickness distribution in Fram Strait [Dataset]. Norwegian Polar Institute. <https://doi.org/10.21334/NPOLAR.2022.B94CB848>, 2022.
- Sumata, H., Granskog, M., & Duarte, P.: Weaker dynamical coupling between sea ice and ocean in a thinner Arctic sea ice regime - Model input, boundary and forcing files v1.0 [Dataset]. Norwegian Polar Institute. <https://doi.org/10.21334/NPOLAR.2025.70C53C63>, 2025.
- Tsamados, M., Feltham, D. L., Schroeder, D., Flocco, D., Farrell, S. L., Kurtz, N., Laxon, S. W., and Bacon, S.: Impact of Variable Atmospheric and Oceanic Form Drag on Simulations of Arctic Sea Ice\*, J Phys Oceanogr, 44, 1329-1353, 10.1175/Jpo-D-13-0215.1, 2014.
- Timmermans, M. L.: The impact of stored solar heat on Arctic sea ice growth, Geophys Res Lett, 42, 6399-6406, 10.1002/2015GL064541, 2015.
- von Albedyll, L., Haas, C., and Dierking, W.: Linking sea ice deformation to ice thickness redistribution using high-resolution satellite and airborne observations, Cryosphere, 15, 2167-2186, 10.5194/tc-15-2167-2021, 2021.
- Ward, J. L. and Tandon, N. F.: Why is summertime Arctic sea ice drift speed projected to decrease?, Cryosphere, 18, 995-1012, 10.5194/tc-18-995-2024, 2024.
- Weeks, W. F. with W.D. Hibler III.: On sea ice, University of Alaska Press, Fairbanks, ISBN 978-1-60223-079-8, 2010.
- Xie, J., Bertino, L., Lisæter, K. A., and Sakov, P.: Quality assessment of the TOPAZ4 reanalysis in the Arctic over the period 1991–2013, Ocean Science, 13, 123–144, 10.5194/os-13-123-2017, 2017.
